# Supplementary material for: Real-time in situ fluorescence imaging of telomerase and miR378 in living cells using a two-color DNA tetrahedron nanoprobe combined with molecular beacons
Source: Royal Society of Chemistry journal article supplement (doi:10.1039/d3an02107f), 2024-01-01
Supplement: d3an02107f1.pdf [file d3an02107f1.pdf]

## Supporting Information

### Real-time in situ fluorescence imaging of telomerase and miR378 in living cells using two-color DNA tetrahedral nanoprobe combined with molecular beacons

Jiejie Guang <sup>a,1</sup>, Shan Wang <sup>a,1</sup>, Bingyuan Fan <sup>a</sup>, Ziyao Yu <sup>b</sup>, Yahui Gao <sup>a</sup>, Jinru Pan <sup>a</sup>, Junting Xi <sup>c,\*</sup>, Wei Meng <sup>a,\*</sup>, Fang Hu <sup>a,\*</sup>

**Table S1** Nucleic acid sequences.

| Name   | Sequences (5'-3')                                                                 |
|--------|-----------------------------------------------------------------------------------|
| L1     | ACATTCCTAAGTCTGAAACATTACAGCTTGCTACACGA<br>GAAGAGCCGCCATAGTATTTTGAGGTAAGGACTGC     |
| L2-1   | TATCACCAGGCAGTTGACAGTGTAGCAAGCTGTAATTT<br>TT-Cy3                                  |
| L2-2   | BBQ-650-<br>TTTTAAGAATAACCCTAACCCTAACCCTAACCC                                     |
| L3     | TCAACTGCCTGGTGATAAAACGACACtACgTGGGAATCT<br>ACTATGGCGGCTCTTCTTTTAATCCGTCGAGCAGAGTT |
| L4     | TCGCGATAGCAGGAATGTGCTTCCCACGTAGTGTCGTTT<br>GGGTTAGGGTTATTCTTCATTCAGACTTGCTATCGCGA |
| MB     | FAM-CACCGATATACCTTCTGACTCCAAGTCCCGGTG<br>/iBHQ1dT/GCAG TCCTTACCTC                 |
| miR378 | ACUGGACUUGGAGUCAGAAGG                                                             |
| mis1   | ACUGGACUUGGAGUGAGAAGG                                                             |
| mis2   | ACUGGACAUGGAGUCACAAGG                                                             |
| mis3   | ACUGGACAUGGUGUCACAAGG                                                             |
| NC     | UUGUACUACAAAAGUACUG                                                               |
| miR21  | UAGCUUAUCAGACUGAUGUUGA                                                            |
| miR155 | UUA AUGCUAAUCGUGAUAGGGGU                                                          |

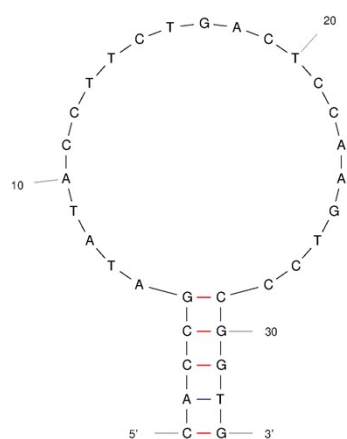

**Fig.S1** Secondary structure of the most suitable MB was simulated using mFold online software;  
 Sequence: CACCGATATACCTTCTGACTCCAAGTCCCGGTG ( $\Delta G = -2.20$ )

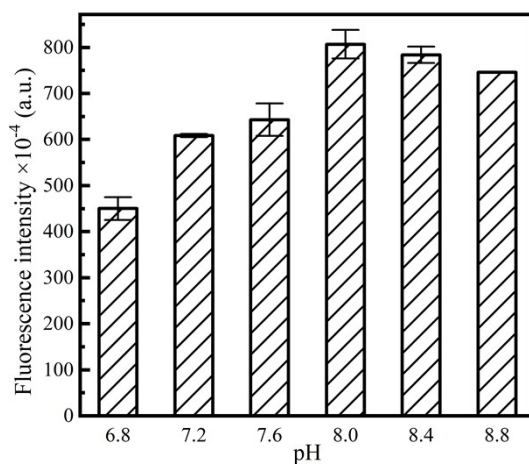

**Fig.S2** Comparing fluorescence differences at different pH levels

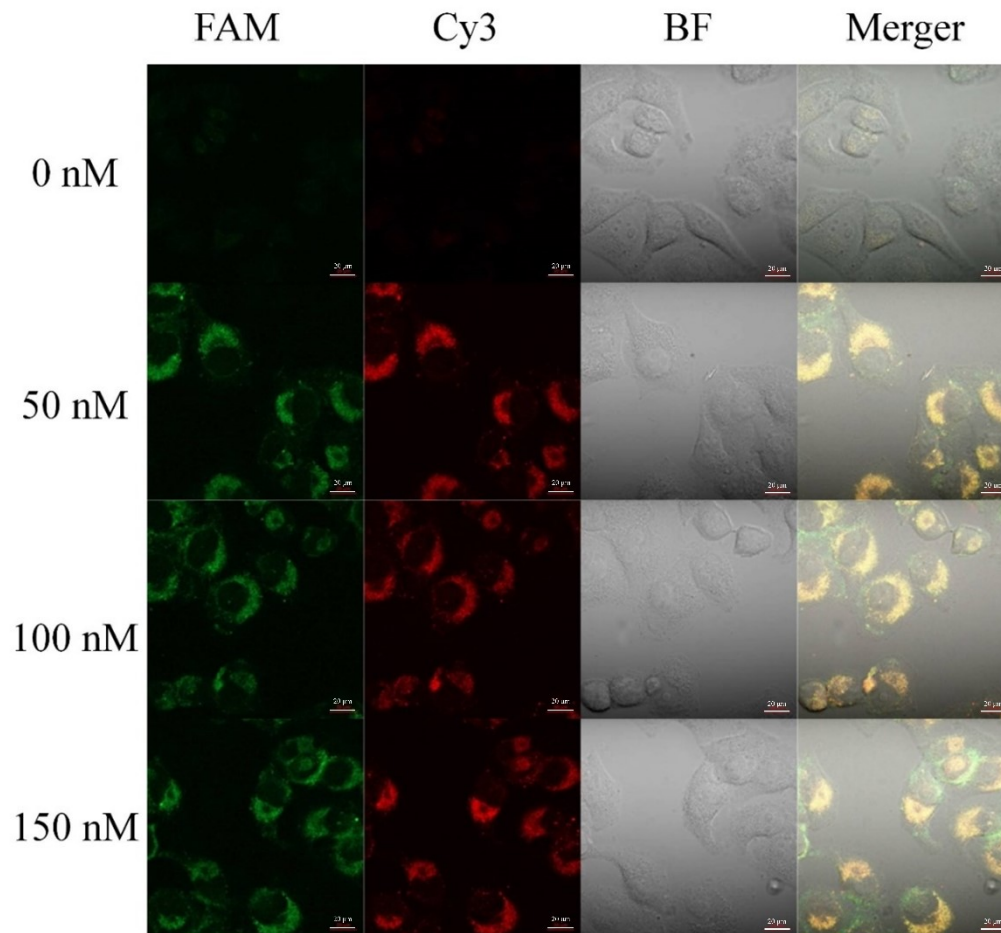

**Fig.S3** Confocal fluorescence images of different DTP concentrations incubated with HeLa cells for 9 h; scale: 20  $\mu$ m

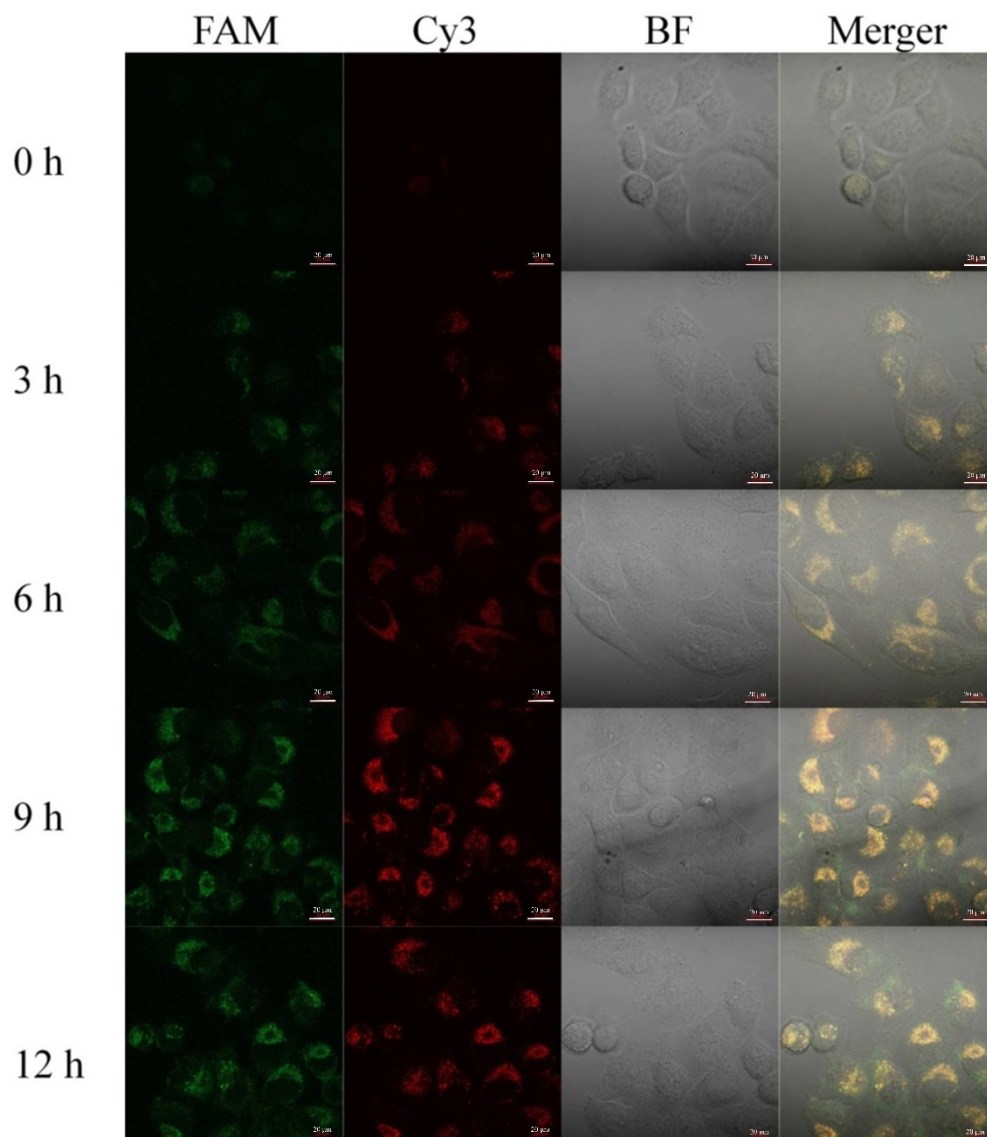

**Fig.S4** Confocal fluorescence images of MB-DNA tetrahedral probe incubated with HeLa cells for different durations; scale: 20  $\mu$ M
